# Supplementary material for: Reducing Pesticide Risk Associated With Dollar Spot Management on Golf Course Turfgrass
Source: Frontiers journal article supplement (doi:10.3389/fagro.2022.881591), 2022-05-13
Supplement: Table_1.docx [file Table_1.docx]

Supplementary Table 1. Analysis of Variance of the Smith-Kerns Reduced Risk Study dollar spot area under the disease progress curve (AUDPC) in 2015 and 2016

| Effect | Num DF | Den DF | F Value | P-value |
| --- | --- | --- | --- | --- |
| Treatment | 3 | 9 | 179.07 | <0.0001 |
| Year | 1 | 60 | 644.14 | <0.0001 |
| Treatment*Year | 3 | 60 | 101.88 | <0.0001 |
| Location | 2 | 60 | 61.96 | <0.0001 |
| Treatment*Location | 6 | 60 | 9.49 | <0.0001 |
| Year*Location | 2 | 60 | 43.21 | <0.0001 |
| Trt*Year*Location | 6 | 60 | 14.95 | <0.0001 |
|  |  |  |  |  |

Supplementary Table 2. Analysis of Variance of the Smith-Kerns Reduced Risk Study dollar spot area under the disease progress curve (AUDPC) conducted at University Ridge Golf Course Hole 18 in Verona, WI, USA with year included as a fixed effect.

| Effect | Num DF | Den DF | F Value | P-value |
| --- | --- | --- | --- | --- |
| Year | 1 | 344 | 73.18 | <0.0001 |
| Treatment | 3 | 344 | 25.04 | <0.0001 |
| Year*Treatment | 3 | 344 | 19.14 | <0.0001 |

Supplementary Table 3. Analysis of Variance of the Smith-Kerns Reduced Risk Study dollar spot area under the disease progress curve (AUDPC) conducted at University Ridge Golf Course Hole 14 in Verona, WI, USA with year included as a fixed effect.

| Effect | Num DF | Den DF | F Value | P-value |
| --- | --- | --- | --- | --- |
| Year | 2 | 513 | 16.73 | <0.0001 |
| Treatment | 3 | 513 | 24.34 | <0.0001 |
| Year*Treatment | 6 | 513 | 4.61 | 0.0001 |
|  |  |  |  |  |

Supplementary Table 4. Analysis of Variance of the Smith-Kerns Reduced Risk Study dollar spot area under the disease progress curve (AUDPC) conducted at the OJ Noer Turfgrass Research Facility in Verona, WI, USA with year included as a fixed effect.

| Effect | Num DF | Den DF | F Value | P-value |
| --- | --- | --- | --- | --- |
| Year | 2 | 532 | 36.99 | <0.0001 |
| Treatment | 3 | 532 | 18.30 | <0.0001 |
| Year*Treatment | 6 | 532 | 1.95 | 0.0717 |
|  |  |  |  |  |

Supplementary Table 2. Dollar spot mean severity and standard error of the mean on each rating date at each location in the SKM Reduced Risk Study conducted at University Ridge Golf Course and the OJ Noer Turfgrass Research Facility in Verona, WI between 2014 and 2016. Dollar spot severity quantified by the number of infection centers. Means were calculated over four replications. CP = Conventional Program, CP-SKM = Conventional Program Smith Kerns Model, RR-SKM = Reduced Risk Smith Kerns Model.

|  | Dollar spot severity ± standard error of the mean | | | | | | | | | | | |
| --- | --- | --- | --- | --- | --- | --- | --- | --- | --- | --- | --- | --- |
| Trt | 2014 University Ridge Hole 7 | | | | | | | | | | | |
|  | Jun 20 | Jul 3 | Jul 17 | Jul 30 | Aug 12 | Aug 28 | Sep 10 | Sep 19 | Oct 01 | | Oct 20 | Nov 10 |
| Control | 0.00 ± 26.6 | 0.00 ± 26.6 | 2.50 ± 26.6 | 4.50 ± 26.6 | 60.00 ± 26.6 | 584.75 ± 26.6 | 339.00 ± 26.6 | 163.75 ± 26.6 | 93.75 ± 26.6 | | 157.25 ± 26.6 | 0.00 ± 26.6 |
| CP | 0.00 ± 26.6 | 0.00 ± 26.6 | 0.25 ± 26.6 | 0.00 ± 26.6 | 6.50 ± 26.6 | 197.50 ± 26.6 | 140.75 ± 26.6 | 18.00 ± 26.6 | 14.75 ± 26.6 | | 30.25 ± 26.6 | 0.00 ± 26.6 |
| CP-SKM | 0.00 ± 26.6 | 0.00 ± 26.6 | 0.00 ± 26.6 | 2.00 ± 26.6 | 2.50 ± 26.6 | 118.00 ± 26.6 | 58.00 ± 26.6 | 19.00 ± 26.6 | 3.25 ± 26.6 | | 30.75 ± 26.6 | 0.00 ± 26.6 |
| RR-SKM | 0.00 ± 26.6 | 0.00 ± 26.6 | 0.00 ± 26.6 | 0.25 ± 26.6 | 0.00 ± 26.6 | 148.50 ± 26.6 | 77.00 ± 26.6 | 2.50 ± 26.6 | 1.50 ± 26.6 | | 67.00 ± 26.6 | 0.00 ± 26.6 |
|  | 2014 University Ridge Hole 14 | | | | | | | | | | | |
|  | Jun 20 | Jul 3 | Jul 17 | Jul 30 | Aug 12 | Aug 28 | Sep 10 | Sep 19 | | Oct 01 | Oct 20 | Nov 10 |
| Control | 0.00 ± 35.9 | 4.50 ± 35.9 | 35.00 ± 35.9 | 83.00 ± 35.9 | 147.50 ± 35.9 | 992.25 ± 35.9 | 689.00 ± 35.9 | 56.25 ± 35.9 | | 215.25 ± 35.9 | 22.50 ± 35.9 | 0.00 ± 35.9 |
| CP | 0.00 ± 35.9 | 0.50 ± 35.9 | 0.00 ± 35.9 | 0.25 ± 35.9 | 0.50 ± 35.9 | 454.50 ± 35.9 | 261.75 ± 35.9 | 201.00 ± 35.9 | | 92.00 ± 35.9 | 14.25 ± 35.9 | 0.00 ± 35.9 |
| CP-SKM | 0.00 ± 35.9 | 1.00 ± 35.9 | 0.00 ± 35.9 | 0.00 ± 35.9 | 0.00 ± 35.9 | 367.25 ± 35.9 | 116.00 ± 35.9 | 14.00 ± 35.9 | | 19.25 ± 35.9 | 15.50 ± 35.9 | 0.00 ± 35.9 |
| RR-SKM | 0.00 ± 35.9 | 1.25 ± 35.9 | 2.00 ± 35.9 | 0.00 ± 35.9 | 3.00 ± 35.9 | 347.75 ± 35.9 | 218.00 ± 35.9 | 80.50 ± 35.9 | | 49.75 ± 35.9 | 10.25 ± 35.9 | 0.00 ± 35.9 |
|  | 2014 OJ Noer Research Facility | | | | | | | | | | | |
|  | Jun 20 | Jul 03 | Jul 17 | Jul 30 | Aug 12 | Aug 28 | Sep 10 | Sep 19 | | Oct 01 | Oct 20 | Nov 10 |
| Control | 46.00 ± 69.4 | 152.75 ± 69.4 | 822.50 ± 69.4 | 1180.00 ± 69.4 | 937.50 ± 69.4 | 1265.00 ± 69.4 | 34.25 ± 69.4 | 0.75 ± 69.4 | | 17.75 ± 69.4 | No rating | 0.00 ± 69.4 |
| CP | 7.25 ± 69.4 | 91.50 ± 69.4 | 23.00 ± 69.4 | 94.75 ± 69.4 | 153.50 ± 69.4 | 2041.00 ± 69.4 | 148.00 ± 69.4 | 20.00 ± 69.4 | | 3.25 ± 69.4 | No rating | 0.00 ± 69.4 |
| CP-SKM | 8.00 ± 69.4 | 53.75 ± 69.4 | 9.25 ± 69.4 | 105.50 ± 69.4 | 306.50 ± 69.4 | 1828.00 ± 69.4 | 86.50 ± 69.4 | 16.50 ± 69.4 | | 0.00 ± 69.4 | No rating | 0.00 ± 69.4 |
| RR-SKM | 5.75 ± 69.4 | 83.25 ± 69.4 | 16.00 ± 69.4 | 55.25 ± 69.4 | 268.25 ± 69.4 | 1906.75 ± 69.4 | 78.25 ± 69.4 | 20.50 ± 69.4 | | 1.75 ± 69.4 | No rating | 0.00 ± 69.4 |
|  | 2015 University Ridge Hole 14 | | | | | | | | | | | |
|  | Jun 04 | Jun 17 | Jun 29 | Jul 15 | Jul 29 | Aug 13 | Sep 09 | Sep 23 | | Oct 07 | Oct 20 | Nov 09 |
| Control | 51.25 ± 74.8 | 218.75 ± 74.8 | 330.50 ± 74.8 | 843.75 ± 74.8 | 1230.50 ± 74.8 | 790.00 ± 74.8 | 292.50 ± 74.8 | 238.75 ± 74.8 | | 0.00 ± 74.8 | 0.00 ± 74.8 | 0.00 ± 74.8 |
| CP | 2.25 ± 74.8 | 63.00 ± 74.8 | 25.00 ± 74.8 | 12.50 ± 74.8 | 0.00 ± 74.8 | 0.00 ± 74.8 | 93.25 ± 74.8 | 242.50 ± 74.8 | | 0.00 ± 74.8 | 0.00 ± 74.8 | 0.00 ± 74.8 |
| CP-SKM | 2.25 ± 74.8 | 35.00 ± 74.8 | 129.50 ± 74.8 | 137.00 ± 74.8 | 71.25 ± 74.8 | 513.75 ± 74.8 | 182.75 ± 74.8 | 264.00 ± 74.8 | | 0.00 ± 74.8 | 0.00 ± 74.8 | 0.00 ± 74.8 |
| RR-SKM | 6.00 ± 74.8 | 68.75 ± 74.8 | 337.50 ± 74.8 | 0.75 ± 74.8 | 3.00 ± 74.8 | 34.00 ± 74.8 | 3.75 ± 74.8 | 248.75 ± 74.8 | | 0.00 ± 74.8 | 0.00 ± 74.8 | 0.00 ± 74.8 |
|  | 2015 University Hole 18 | | | | | | | | | | | |
|  | Jun 04 | Jun 17 | Jun 29 | Jul 15 | Jul 29 | Aug 13 | Sep 09 | Sep 23 | | Oct 07 | Oct 20 | Nov 09 |
| Control | 114.50±65.5 | 327.50 ± 65.5 | 765.00 ± 65.5 | 2052.75 ± 65.5 | 2500.00 ± 65.5 | 1337.50 ± 65.5 | 1562.50 ± 65.5 | 525.00 ± 65.5 | | 175.00 ± 65.5 | 0.00 ± 65.5 | 0.00 ± 65.5 |
| CP | 3.25 ± 65.5 | 137.50 ± 65.5 | 110.75 ± 65.5 | 0.00 ± 65.5 | 87.50 ± 65.5 | 32.50 ± 65.5 | 437.50 ± 65.5 | 487.50 ± 65.5 | | 15.75 ± 65.5 | 0.00 ± 65.5 | 0.00 ± 65.5 |
| CP-SKM | 65.00 ± 65.5 | 123.75 ± 65.5 | 422.50 ± 65.5 | 188.75 ± 65.5 | 150.00 ± 65.5 | 1165.00 ± 65.5 | 300.00 ± 65.5 | 425.00 ± 65.5 | | 35.75 ± 65.5 | 0.00 ± 65.5 | 0.00 ± 65.5 |
| RR-SKM | 36.50 ± 65.5 | 113.75 ± 65.5 | 415.50 ± 65.5 | 22.25 ± 65.5 | 36.25 ± 65.5 | 95.50 ± 65.5 | 25.00 ± 65.5 | 650.00 ± 65.5 | | 70.00 ± 65.5 | 0.00 ± 65.5 | 0.00 ± 65.5 |
|  | 2015 OJ Noer Research Facility | | | | | | | | | | | |
|  | Jun 04 | Jun 17 | Jun 29 | Jul 15 | Jul 29 | Aug 13 | Aug 20 | Sep 04 | | Sep 16 | Sep 30 | Oct 12 |
| Control | 975.50 ± 65.5 | 1583.75 ± 65.5 | 1116.25 ± 65.5 | 947.50 ± 65.5 | 544.25 ± 65.5 | 75.75 ± 65.5 | 385.00 ± 65.5 | 572.50 ± 65.5 | | 590.00 ± 65.5 | 615.00 ± 65.5 | 783.75 ± 65.5 |
| CP | 339.5 ± 65.5 | 682.25 ± 65.5 | 455.25 ± 65.5 | 100.00 ± 65.5 | 115.75 ± 65.5 | 13.50 ± 65.5 | 183.00 ± 65.5 | 415.00 ± 65.5 | | 81.25 ± 65.5 | 150.00 ± 65.5 | 180.0 ± 65.5 |
| CP-SKM | 857.8 ± 65.5 | 922.50 ± 65.5 | 656.25 ± 65.5 | 136.75 ± 65.5 | 205.00 ± 65.5 | 81.00 ± 65.5 | 54.75 ± 65.5 | 593.75 ± 65.5 | | 156.25 ± 65.5 | 171.25 ± 65.5 | 201.3 ± 65.5 |
| RR-SKM | 767.50 ± 65.5 | 1112.50 ± 65.5 | 797.50 ± 65.5 | 89.50 ± 65.5 | 78.75 ± 65.5 | 7.00 ± 65.5 | 53.50 ± 65.5 | 18.50 ± 65.5 | | 118.75 ± 65.5 | 168.25 ± 65.5 | 198.75 ± 65.5 |
|  | 2016 University Ridge Hole 14 | | | | | | | | | | | |
|  | Jun 14 | Jun 27 | Jul 12 | Jul 28 | Aug 09 | Aug 22 | Sep 07 | Sep 20 | | Oct 10 | Oct 18 | Nov 04 |
| Control | 6.50 ± 15.6 | 16.25 ± 15.6 | 62.25 ± 15.6 | 297.00 ± 15.6 | 230.25 ± 15.6 | 116.25 ± 15.6 | 25.50 ± 15.6 | 54.00 ± 15.6 | | 78.00 ± 15.6 | 10.50 ± 15.6 | 0.00 ± 15.6 |
| CP | 0.25 ± 15.6 | 0.50 ± 15.6 | 0.00 ± 15.6 | 0.00 ± 15.6 | 0.00 ± 15.6 | 26.00 ± 15.6 | 47.25 ± 15.6 | 43.25 ± 15.6 | | 44.50 ± 15.6 | 4.50 ± 15.6 | 0.00 ± 15.6 |
| CP-SKM | 1.00 ± 15.6 | 3.00 ± 15.6 | 2.00 ± 15.6 | 0.50 ± 15.6 | 0.00 ± 15.6 | 6.00 ± 15.6 | 112.25 ± 15.6 | 17.00 ± 15.6 | | 27.25 ± 15.6 | 7.00 ± 15.6 | 0.00 ± 15.6 |
| RR-SKM | 0.25 ± 15.6 | 0.75 ± 15.6 | 0.00 ± 15.6 | 0.00 ± 15.6 | 26.75 ± 15.6 | 3.75 ± 15.6 | 26.50 ± 15.6 | 2.25 ± 15.6 | | 17.00 ± 15.6 | 3.25 ± 15.6 | 0.00 ± 15.6 |
|  | 2016 University Ridge Hole 18 | | | | | | | | | | | |
|  | Jun 14 | Jun 27 | Jul 12 | Jul 28 | Aug 09 | Aug 22 | Sep 07 | Sep 20 | | Oct 10 | Oct 18 | Nov 04 |
| Control | 0.50 ± 11.4 | 3.00 ± 11.4 | 15.75 ± 11.4 | 110.25 ± 11.4 | 155.25 ± 11.4 | 152.50 ± 11.4 | 146.75 ± 11.4 | 87.50 ± 11.4 | | 18.50 ± 11.4 | 6.25 ± 11.4 | 0.00 ± 11.4 |
| CP | 0.00 ± 11.4 | 0.50 ± 11.4 | 0.00 ± 11.4 | 0.00 ± 11.4 | 0.00 ± 11.4 | 14.50 ± 11.4 | 46.25 ± 11.4 | 137.25 ± 11.4 | | 30.25 ± 11.4 | 5.50 ± 11.4 | 0.00 ± 11.4 |
| CP-SKM | 0.00 ± 11.4 | 2.25 ± 11.4 | 0.25 ± 11.4 | 2.25 ± 11.4 | 0.75 ± 11.4 | 1.50 ± 11.4 | 0.75 ± 11.4 | 10.00 ± 11.4 | | 63.50 ± 11.4 | 1.75 ± 11.4 | 0.00 ± 11.4 |
| RR-SKM | 0.00 ± 11.4 | 0.50 ± 11.4 | 0.00 ± 11.4 | 0.00 ± 11.4 | 0.00 ± 11.4 | 5.25 ± 11.4 | 53.50 ± 11.4 | 48.50 ± 11.4 | | 38.00 ± 11.4 | 5.75 ± 11.4 | 0.00 ± 11.4 |
|  | 2016 OJ Noer Research Facility | | | | | | | | | | | |
|  | Jun 03 | Jun 14 | Jun 27 | Jul 12 | Jul 29 | Aug 09 | Aug 22 | Sep 09 | | Sep 20 | Oct 10 | Oct 19 |
| Control | 55.25 ± 19.9 | 150.75 ± 19.9 | 224.75 ± 19.9 | 300.50 ± 19.9 | 273.50 ± 19.9 | 274.50 ± 19.9 | 229.50 ± 19.9 | 408.00 ± 19.9 | | 202.00 ± 19.9 | 191.25 ± 19.9 | 167.50 ± 19.9 |
| CP | 37.00 ± 19.9 | 5.75 ± 19.9 | 2.50 ± 19.9 | 6.75 ± 19.9 | 0.00 ± 19.9 | 0.00 ± 19.9 | 12.50 ± 19.9 | 106.00 ± 19.9 | | 167.50 ± 19.9 | 141.25 ± 19.9 | 126.75 ± 19.9 |
| CP-SKM | 23.00 ± 19.9 | 4.25 ± 19.9 | 8.00 ± 19.9 | 10.25 ± 19.9 | 5.25 ± 19.9 | 32.75 ± 19.9 | 6.25 ± 19.9 | 2.50 ± 19.9 | | 18.75 ± 19.9 | 48.50 ± 19.9 | 32.75 ± 19.9 |
| RR-SKM | 8.50 ± 19.9 | 1.50 ± 19.9 | 5.25 ± 19.9 | 2.25 ± 19.9 | 1.00 ± 19.9 | 0.00 ± 19.9 | 0.00 ± 19.9 | 0.00 ± 19.9 | | 18.25 ± 19.9 | 16.00 ± 19.9 | 7.50 ± 19.9 |

Supplementary Table 3. Analysis of Variance of the State Risk Comparison Study dollar spot area under the disease progress curve (AUDPC) conducted at the OJ Noer Turfgrass Research Facility in Verona, WI, USA with year included as a fixed effect.

| Effect | Num DF | Den DF | F Value | P-value |
| --- | --- | --- | --- | --- |
| Year | 3 | 680 | 4.71 | 0.0029 |
| Treatment | 4 | 680 | 18.30 | <0.0001 |
| Year*Treatment | 12 | 680 | 1.95 | <0.0001 |

Supplementary Table 4. Dollar spot mean severity and standard error of the mean on each rating date in the State Average Study conducted at the OJ Noer Turfgrass Research Facility in Verona, WI between 2017 and 2020. Dollar spot severity quantified by the number of infection centers. Means were calculated over four replications. SA-100% = 100% of the Wisconsin State Average Hazard Quotient, SA-75% = 75% of the Wisconsin State Average Hazard Quotient, SA-50% = 50% of the Wisconsin State Average Hazard Quotient, SA-25% = 25% of the Wisconsin State Average Hazard Quotient.

|  | Dollar spot severity ± standard error of the mean | | | | | | | | | |
| --- | --- | --- | --- | --- | --- | --- | --- | --- | --- | --- |
| Trt | 2017 | | | | | | | | | |
|  | Jun 13 | Jun 28 | Jul 13 | Jul 27 | Aug 07 | Aug 21 | Sep 07 | Sep 21 | Oct 13 | |
| Control | 3.75 ± 9.9 | 41.50 ± 9.9 | 197.00 ± 9.9 | 2.75 ± 9.9 | 67.50 ± 9.9 | 251.50 ± 9.9 | 107.50 ± 9.9 | 0.00 ± 9.9 | 0.00 ± 9.9 | |
| SA-100% | 0.00 ± 9.9 | 2.25 ± 9.9 | 13.25 ± 9.9 | 0.25 ± 9.9 | 7.00 ± 9.9 | 16.75 ± 9.9 | 3.75 ± 9.9 | 0.00 ± 9.9 | 0.00 ± 9.9 | |
| SA-75% | 1.25 ± 9.9 | 1.75 ± 9.9 | 4.00 ± 9.9 | 0.25 ± 9.9 | 1.00 ± 9.9 | 25.25 ± 9.9 | 27.50 ± 9.9 | 0.00 ± 9.9 | 0.00 ± 9.9 | |
| SA-50% | 1.75 ± 9.9 | 0.75 ± 9.9 | 0.75 ± 9.9 | 0.00 ± 9.9 | 0.00 ± 9.9 | 85.50 ± 9.9 | 3.00 ± 9.9 | 0.00 ± 9.9 | 0.00 ± 9.9 | |
| SA-25% | 1.00 ± 9.9 | 0.75 ± 9.9 | 0.75 ± 9.9 | 0.00 ± 9.9 | 0.00 ± 9.9 | 24.50 ± 9.9 | 13.25 ± 9.9 | 0.00 ± 9.9 | 0.00 ± 9.9 | |
|  | 2018 | | | | | | | | | |
|  | Jun 14 | Jun 29 | Jul 11 | Jul 18 | Jul 25 | Aug 08 | Sep 07 | Sep 24 | | Oct 08 |
| Control | 0.25 ± 7.1 | 0.75 ± 7.1 | 17.00 ± 7.1 | 55.00 ± 7.1 | 28.00 ± 7.1 | 133.50 ± 7.1 | 4.00 ± 7.1 | 0.00 ± 7.1 | | 0.00 ± 7.1 |
| SA-100% | 0.00 ± 7.1 | 0.00 ± 7.1 | 1.50 ± 7.1 | 41.00 ± 7.1 | 11.25 ± 7.1 | 29.25 ± 7.1 | 15.00 ± 7.1 | 79.00 ± 7.1 | | 2.50 ± 7.1 |
| SA-75% | 0.00 ± 7.1 | 0.00 ± 7.1 | 0.00 ± 7.1 | 3.75 ± 7.1 | 9.00 ± 7.1 | 2.25 ± 7.1 | 2.00 ± 7.1 | 69.00 ± 7.1 | | 1.25 ± 7.1 |
| SA-50% | 0.00 ± 7.1 | 0.00 ± 7.1 | 0.75 ± 7.1 | 0.00 ± 7.1 | 2.25 ± 7.1 | 0.00 ± 7.1 | 6.75 ± 7.1 | 89.50 ± 7.1 | | 0.00 ± 7.1 |
| SA-25% | 0.25 ± 7.1 | 0.00 ± 7.1 | 1.00 ± 7.1 | 0.00 ± 7.1 | 3.00 ± 7.1 | 0.00 ± 7.1 | 6.25 ± 7.1 | 22.75 ± 7.1 | | 0.00 ± 7.1 |
|  | 2019 | | | | | | | | | |
|  | Jun 12 | Jun 26 | Jul 10 | Jul 24 | Aug 07 | Aug 21 | Sep 05 | Sep 18 | | No rating |
| Control | 0.00 ± 13.0 | 4.00 ± 13.0 | 6.25 ± 13.0 | 2.25 ± 13.0 | 10.75 ± 13.0 | 30.50 ± 13.0 | 517.75 ± 13.0 | 171.25 ± 13.0 | | No rating |
| SA-100% | 0.00 ± 13.0 | 0.00 ± 13.0 | 0.00 ± 13.0 | 0.00 ± 13.0 | 3.50 ± 13.0 | 0.00 ± 13.0 | 0.75 ± 13.0 | 8.75 ± 13.0 | | No rating |
| SA-75% | 0.00 ± 13.0 | 0.00 ± 13.0 | 0.00 ± 13.0 | 0.50 ± 13.0 | 1.25 ± 13.0 | 0.00 ± 13.0 | 7.50 ± 13.0 | 15.25 ± 13.0 | | No rating |
| SA-50% | 0.00 ± 13.0 | 0.00 ± 13.0 | 3.25 ± 13.0 | 0.00 ± 13.0 | 0.00 ± 13.0 | 0.00 ± 13.0 | 0.00 ± 13.0 | 0.75 ± 13.0 | | No rating |
| SA-25% | 0.00 ± 13.0 | 0.00 ± 13.0 | 0.00 ± 13.0 | 0.00 ± 13.0 | 0.00 ± 13.0 | 0.75 ± 13.0 | 0.00 ± 13.0 | 7.75 ± 13.0 | | No rating |
|  | 2020 | | | | | | | | | |
|  | Jun 11 | Jun 24 | Jul 08 | Jul 22 | Aug 05 | Aug 19 | Sep 02 | Sep 16 | | Oct 02 |
| Control | 2.50 ± 13.8 | 13.00 ± 13.8 | 114.25 ± 13.8 | 107.25 ± 13.8 | 123.25 ± 13.8 | 136.25 ± 13.8 | 509.00 ± 13.8 | 221.50 ± 13.8 | | 197.50 ± 13.8 |
| SA-100% | 0.00 ± 13.8 | 0.25 ± 13.8 | 9.25 ± 13.8 | 42.25 ± 13.8 | 33.25 ± 13.8 | 3.50 ± 13.8 | 3.25 ± 13.8 | 2.25 ± 13.8 | | 10.75 ± 13.8 |
| SA-75% | 0.50 ± 13.8 | 0.00 ± 13.8 | 2.25 ± 13.8 | 7.25 ± 13.8 | 46.25 ± 13.8 | 4.00 ± 13.8 | 3.00 ± 13.8 | 1.25 ± 13.8 | | 2.25 ± 13.8 |
| SA-50% | 0.25 ± 13.8 | 0.50 ± 13.8 | 2.50 ± 13.8 | 1.50 ± 13.8 | 2.00 ± 13.8 | 2.25 ± 13.8 | 0.75 ± 13.8 | 0.00 ± 13.8 | | 0.50 ± 13.8 |
| SA-25% | 1.75 ± 13.8 | 0.00 ± 13.8 | 1.25 ± 13.8 | 1.50 ± 13.8 | 0.00 ± 13.8 | 5.00 ± 13.8 | 2.25 ± 13.8 | 13.75 ± 13.8 | | 3.75 ± 13.8 |
